# Supplementary material for: A computational study of design and performance investigation of Ni-based electrocatalysts for efficient electrocatalytic hydrogen evolution reaction
Source: Royal Society of Chemistry journal article supplement (doi:10.1039/d3nj02351f), 2023-01-01
Supplement: d3nj02351f1.pdf [file d3nj02351f1.pdf]

## Electronic Supplementary Information

# A computational study of design and performance investigation of Ni-based electrocatalysts for efficient electrocatalytic hydrogen evolution reaction

Jingyi Zou, Xuefeng Ren\*

School of Ocean Science and Technology, Dalian University of Technology, Panjin, 124221, China.

E-mail: [renxuefeng@dlut.edu.cn](mailto:renxuefeng@dlut.edu.cn)

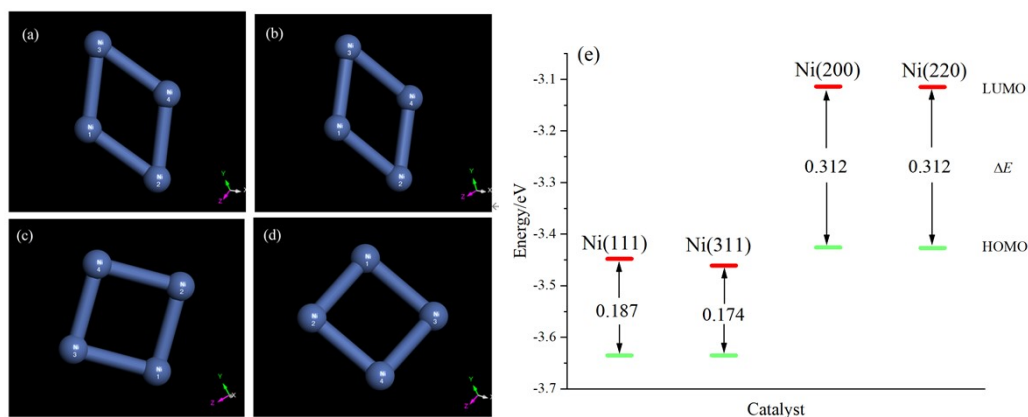

**Figure S1.** The optimized geometry structure of (a) Ni(111), (b) Ni(311), (c) Ni(200) and (d) Ni(220) crystal planes;  $E_{\text{HOMO}}$ ,  $E_{\text{LUMO}}$  and  $\Delta E$  distribution diagram (e) of different Ni crystal planes after optimization.

**Table S1.** Fukui(-) indices of Ni(111) and Ni(311) crystal planes.

| Ni(111)  |          | Ni(311)  |          |
|----------|----------|----------|----------|
| Fukui(-) | Mulliken | Fukui(-) | Mulliken |
| Ni(1)    | 0.174    | Ni(1)    | 0.173    |
| Ni(2)    | 0.328    | Ni(2)    | 0.327    |
| Ni(3)    | 0.326    | Ni(3)    | 0.326    |
| Ni(4)    | 0.172    | Ni(4)    | 0.174    |

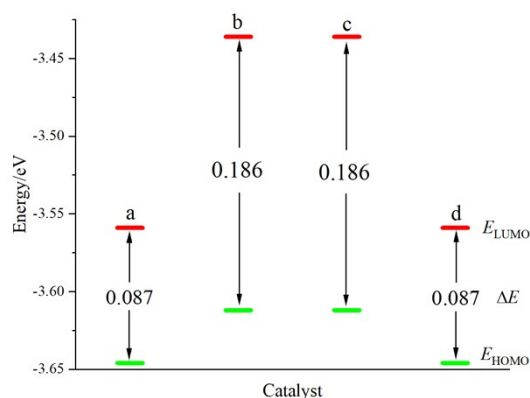

**Figure S2.**  $E_{\text{HOMO}}$ ,  $E_{\text{LUMO}}$  and  $\Delta E$  distribution diagram of unitary-Co-doped Ni(311) crystal planes:

- (a) Ni (311)-2,3,4Ni -1Co; (b) Ni (311)-1,3,4Ni -2Co;  
(c) Ni (311)-1,2,4Ni -3Co; (d) Ni (311)-1,2,3Ni -4Co;

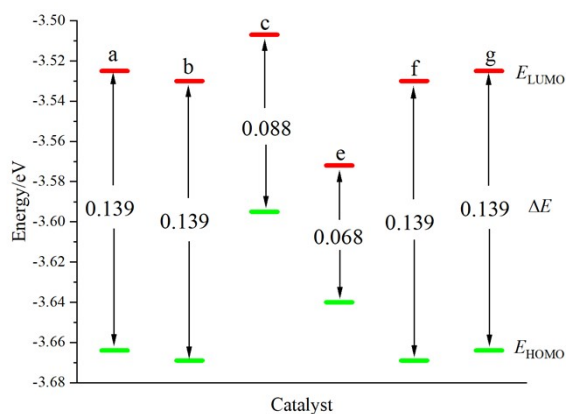

**Figure S3.**  $E_{\text{HOMO}}$ ,  $E_{\text{LUMO}}$  and  $\Delta E$  distribution diagram of binary-Co-doped Ni(311) crystal planes:

- (a) Ni (311) -3,4Ni -1,2Co; (b) Ni (311) -2,4Ni -1,3Co; (c) Ni (311) -2,3Ni -1,4Co;  
(d) Ni (311) -1,4Ni -2,3Co; (e) Ni (311) -1,3Ni -2,4Co; (f) Ni (311) -1,2Ni -3,4Co;

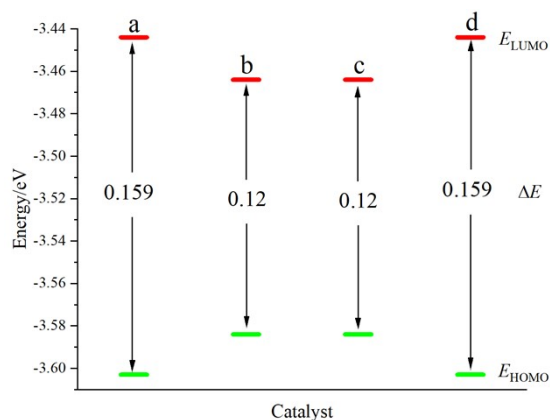

**Figure S4.**  $E_{\text{HOMO}}$ ,  $E_{\text{LUMO}}$  and  $\Delta E$  distribution diagram of ternary-Co-doped Ni(311) crystal planes:

- (a) Ni (311) -4Ni -1,2,3Co; (b) Ni (311)- 3Ni -1,2,4Co;  
(c) Ni (311) -2Ni -1,3,4Co; (d) Ni (311) -1Ni -2,3,4Co;

**Table S2.** Fukui(-) indices of four selected Co-doped Ni(311) crystal planes.

| Ni(311)-2,3,4Ni-1Co |          | Ni(311)-1,2,3Ni-4Co |          | Ni(311)-2,3Ni-1,4Co |          | Ni(311)-1,4Ni-2,3Co |          |
|---------------------|----------|---------------------|----------|---------------------|----------|---------------------|----------|
| Fukui(-)            | Mulliken | Fukui(-)            | Mulliken | Fukui(-)            | Mulliken | Fukui(-)            | Mulliken |
| Co(1)               | 0.167    | Ni(1)               | 0.178    | Co(1)               | 0.171    | Ni(1)               | 0.181    |
| Ni(2)               | 0.328    | Ni(2)               | 0.327    | Ni(2)               | 0.329    | Co(2)               | 0.325    |
| Ni(3)               | 0.328    | Ni(3)               | 0.329    | Ni(3)               | 0.330    | Co(3)               | 0.313    |
| Ni(4)               | 0.177    | Co(4)               | 0.167    | Co(4)               | 0.170    | Ni(4)               | 0.181    |

**Table S3.** Fukui(-) indices of four selected Co-doped Ni(111) crystal planes.

| Ni(111)-2,3,4Ni-1Co |          | Ni(111)-1,2,3Ni-4Co |          | Ni(111)-2,3Ni-1,4Co |          | Ni(111)-1,4Ni-2,3Co |          |
|---------------------|----------|---------------------|----------|---------------------|----------|---------------------|----------|
| Fukui(-)            | Mulliken | Fukui(-)            | Mulliken | Fukui(-)            | Mulliken | Fukui(-)            | Mulliken |
| Co(1)               | 0.169    | Ni(1)               | 0.177    | Co(1)               | 0.170    | Ni(1)               | 0.184    |
| Ni(2)               | 0.328    | Ni(2)               | 0.328    | Ni(2)               | 0.326    | Co(2)               | 0.320    |
| Ni(3)               | 0.327    | Ni(3)               | 0.326    | Ni(3)               | 0.329    | Co(3)               | 0.313    |
| Ni(4)               | 0.176    | Co(4)               | 0.169    | Co(4)               | 0.174    | Ni(4)               | 0.183    |

**Table S4.** The calculation process for  $E_{\text{H}_2\text{O}_{\text{ads}}}$  (Figure 5) of Co-doped Ni(111) crystal planes.

| Catalyst            | $E_{\text{slab}+\text{H}_2\text{O}}/\text{Ha}$ | $E_{\text{slab}}/\text{Ha}$ | $E_{\text{H}_2\text{O}}/\text{Ha}$ | $E_{\text{H}_2\text{O}_{\text{ads}}}/\text{Ha}$ | $E_{\text{H}_2\text{O}_{\text{ads}}}/\text{eV}$ |
|---------------------|------------------------------------------------|-----------------------------|------------------------------------|-------------------------------------------------|-------------------------------------------------|
| Ni(111)             | -6109.035                                      | -6032.600                   | -76.388                            | -0.047                                          | -1.276                                          |
| Ni(111)-1,4Ni-2,3Co | -5857.880                                      | -5781.433                   | -76.388                            | -0.059                                          | -1.617                                          |
| Ni(111)-2,3Ni-1,4Co | -5857.884                                      | -5781.451                   | -76.388                            | -0.045                                          | -1.221                                          |
| Ni(111)-2,3,4Ni-1Co | -5983.458                                      | -5907.027                   | -76.388                            | -0.043                                          | -1.180                                          |
| Ni(111)-1,2,3Ni-4Co | -5983.461                                      | -5907.027                   | -76.388                            | -0.046                                          | -1.259                                          |

**Table S5.** The calculation process for  $E_{\text{H}_2\text{O}_{\text{ads}}}$  (Figure 6) of Co-doped Ni(311) crystal planes.

| Catalyst                                                   | $E_{\text{slab}+\text{H}_2\text{O}}/\text{Ha}$ | $E_{\text{slab}}/\text{Ha}$ | $E_{\text{H}_2\text{O}}/\text{Ha}$ | $E_{\text{H}_2\text{O}_{\text{ads}}}/\text{Ha}$ | $E_{\text{H}_2\text{O}_{\text{ads}}}/\text{eV}$ |
|------------------------------------------------------------|------------------------------------------------|-----------------------------|------------------------------------|-------------------------------------------------|-------------------------------------------------|
| Ni(311)                                                    | -6109.005                                      | -6032.600                   | -76.388                            | -0.017                                          | -0.458                                          |
| Ni(311)-1,4Ni-2,3Co                                        | -5857.837                                      | -5781.433                   | -76.388                            | -0.016                                          | -0.435                                          |
| Ni(311)-2,3Ni-1,4Co                                        | -5857.884                                      | -5781.451                   | -76.388                            | -0.045                                          | -1.217                                          |
| Ni(311)-1,2,3Ni-4Co                                        | -5983.430                                      | -5907.027                   | -76.388                            | -0.015                                          | -0.421                                          |
| Ni(311)-2,3,4Ni-1Co<br>(optimal active site at position 2) | -5983.430                                      | -5907.027                   | -76.388                            | -0.015                                          | -0.418                                          |
| Ni(311)-2,3,4Ni-1Co<br>(optimal active site at position 3) | -5983.428                                      | -5907.027                   | -76.388                            | -0.013                                          | -0.341                                          |

**Table S6.** The calculation process for  $\Delta G_{H\_ads}$  (Figure 7) of Co-doped Ni(111) crystal planes.

| Catalyst            | $E_{slab+H}/Ha$ | $E_{slab}/Ha$ | $E_{H_2}/Ha$ | $E_{H\_ads}/Ha$ | $E_{H\_ads}/eV$ | $\Delta G_{H\_ads}/eV$ |
|---------------------|-----------------|---------------|--------------|-----------------|-----------------|------------------------|
| Ni(111)             | -6033.215       | -6032.600     | -1.164       | -0.033          | -0.908          | -0.668                 |
| Ni(111)-1,4Ni-2,3Co | -5782.060       | -5781.433     | -1.164       | -0.045          | -1.221          | -0.981                 |
| Ni(111)-2,3Ni-1,4Co | -5782.063       | -5781.451     | -1.164       | -0.030          | -0.816          | -0.576                 |
| Ni(111)-1,2,3Ni-4Co | -5907.637       | -5907.027     | -1.164       | -0.028          | -0.771          | -0.531                 |
| Ni(111)-2,3,4Ni-1Co | -5907.640       | -5907.027     | -1.164       | -0.031          | -0.849          | -0.609                 |

**Table S7.** The calculation process for  $\Delta G_{H\_ads}$  (Figure 8) of Co-doped Ni(311) crystal planes.

| Catalyst                                                   | $E_{slab+H}/Ha$ | $E_{slab}/Ha$ | $E_{H_2}/Ha$ | $E_{H\_ads}/Ha$ | $E_{H\_ads}/eV$ | $\Delta G_{H\_ads}/eV$ |
|------------------------------------------------------------|-----------------|---------------|--------------|-----------------|-----------------|------------------------|
| Ni(311)                                                    | -6033.211       | -6032.600     | -1.164       | -0.029          | -0.780          | -0.540                 |
| Ni(311)-1,4Ni-2,3Co                                        | -5782.066       | -5781.433     | -1.164       | -0.051          | -1.379          | -1.139                 |
| Ni(311)-2,3Ni-1,4Co                                        | -5782.063       | -5781.451     | -1.164       | -0.030          | -0.816          | -0.576                 |
| Ni(311)-1,2,3Ni-4Co                                        | -5907.637       | -5907.027     | -1.164       | -0.029          | -0.779          | -0.539                 |
| Ni(311)-2,3,4Ni-1Co<br>(optimal active site at position 3) | -5907.637       | -5907.027     | -1.164       | -0.028          | -0.773          | -0.533                 |
| Ni(311)-2,3,4Ni-1Co<br>(optimal active site at position 2) | -5907.640       | -5907.027     | -1.164       | -0.032          | -0.858          | -0.618                 |

**Table S8.** The calculation process for  $E_{H_2O\_ads}$  (Figure 9) of Mo-doped Ni(111)-1,4Ni-2,3Co catalysts.

| Catalyst              | $E_{slab+H_2O}/Ha$ | $E_{slab}/Ha$ | $E_{H_2O}/Ha$ | $E_{H_2O\_ads}/Ha$ | $E_{H_2O\_ads}/eV$ |
|-----------------------|--------------------|---------------|---------------|--------------------|--------------------|
| Ni(111)-1,4Ni-2,3Co   | -5857.880          | -5781.433     | -76.388       | -0.059             | -1.617             |
| Ni(111)-1Ni-2,3Co-4Mo | -8326.942          | -8250.516     | -76.388       | -0.039             | -1.048             |
| Ni(111)-4Ni-2,3Co-1Mo | -8326.923          | -8250.516     | -76.388       | -0.019             | -0.510             |

**Table S9.** The calculation process for  $E_{H_2O\_ads}$  (Figure 10) of Mo-doped Ni(311)-2,3Ni-1,4Co catalysts.

| Catalyst              | $E_{slab+H_2O}/Ha$ | $E_{slab}/Ha$ | $E_{H_2O}/Ha$ | $E_{H_2O\_ads}/Ha$ | $E_{H_2O\_ads}/eV$ |
|-----------------------|--------------------|---------------|---------------|--------------------|--------------------|
| Ni(311)-2,3Ni-1,4Co   | -5857.884          | -5781.451     | -76.388       | -0.045             | -1.217             |
| Ni(311)-2Ni-1,4Co-3Mo | -8326.941          | -8250.497     | -76.388       | -0.056             | -1.521             |
| Ni(311)-3Ni-1,4Co-2Mo | -8326.920          | -8250.497     | -76.388       | -0.035             | -0.949             |

**Table S10.** The calculation process for  $\Delta G_{H\_ads}$  (Figure 11) of Mo-doped Ni(311)-2,3,4Ni-1Co catalysts.

| Catalyst                                                     | $E_{slab+H}/Ha$ | $E_{slab}/Ha$ | $E_{H_2}/Ha$ | $E_{H\_ads}/Ha$ | $E_{H\_ads}/eV$ | $\Delta G_{H\_ads}/eV$ |
|--------------------------------------------------------------|-----------------|---------------|--------------|-----------------|-----------------|------------------------|
| Ni(311)-2,3,4Ni-1Co                                          | -5907.637       | -5907.027     | -1.164       | -0.028          | -0.773          | -0.533                 |
| Ni(311)-2Ni-1Co-3,4Mo                                        | -10845.76       | -10845.16     | -1.164       | -0.024          | -0.655          | -0.415                 |
| Ni(311)-3Ni-1Co-2,4Mo                                        | -10845.76       | -10845.16     | -1.164       | -0.024          | -0.652          | -0.412                 |
| Ni(311)-4Ni-1Co-2,3Mo                                        | -10845.77       | -10845.15     | -1.164       | -0.032          | -0.879          | -0.639                 |
| Ni(311)-2,3Ni-1Co-4Mo<br>(optimal active site at position 2) | -8376.696       | -8376.085     | -1.164       | -0.029          | -0.796          | -0.556                 |
| Ni(311)-2,3Ni-1Co-4Mo<br>(optimal active site at position 3) | -8376.696       | -8376.085     | -1.164       | -0.029          | -0.791          | -0.551                 |
| Ni(311)-2,4Ni-1Co-3Mo                                        | -8376.697       | -8376.075     | -1.164       | -0.040          | -1.097          | -0.857                 |
| Ni(311)-3,4Ni-1Co-2Mo                                        | -8376.696       | -8376.075     | -1.164       | -0.040          | -1.081          | -0.841                 |

**Table S11.** The calculation process for  $\Delta G_{H\_ads}$  (Figure 12) of Mo-doped Ni(111)-1,2,3Ni-4Co catalysts.

| Catalyst              | $E_{slab+H}/Ha$ | $E_{slab}/Ha$ | $E_{H_2}/Ha$ | $E_{H\_ads}/Ha$ | $E_{H\_ads}/eV$ | $\Delta G_{H\_ads}/eV$ |
|-----------------------|-----------------|---------------|--------------|-----------------|-----------------|------------------------|
| Ni(111)-1,2,3Ni-4Co   | -5907.637       | -5907.027     | -1.164       | -0.028          | -0.771          | -0.531                 |
| Ni(111)-1Ni-4Co-2,3Mo | -10845.78       | -10845.10     | -1.164       | -0.096          | -2.624          | -2.384                 |
| Ni(111)-2Ni-4Co-1,3Mo | -10845.77       | -10845.16     | -1.164       | -0.037          | -1.002          | -0.762                 |
| Ni(111)-3Ni-4Co-1,2Mo | -10845.77       | -10845.15     | -1.164       | -0.037          | -1.001          | -0.761                 |
| Ni(111)-1,2Ni-4Co-3Mo | -8376.697       | -8376.057     | -1.164       | -0.058          | -1.586          | -1.346                 |
| Ni(111)-1,3Ni-4Co-2Mo | -8376.703       | -8376.086     | -1.164       | -0.035          | -0.943          | -0.703                 |
| Ni(111)-2,3Ni-4Co-1Mo | -8376.696       | -8376.085     | -1.164       | -0.029          | -0.794          | -0.554                 |

**Table S12.** The calculation process for  $\Delta G_{H\_ads}$  (Figure 13) of Mo-doped Ni(311)-1,2,3Ni-4Co catalysts.

| Catalyst                                                     | $E_{slab+H}/Ha$ | $E_{slab}/Ha$ | $E_{H_2}/Ha$ | $E_{H\_ads}/Ha$ | $E_{H\_ads}/eV$ | $\Delta G_{H\_ads}/eV$ |
|--------------------------------------------------------------|-----------------|---------------|--------------|-----------------|-----------------|------------------------|
| Ni(311)-1,2,3Ni-4Co                                          | -5907.637       | -5907.027     | -1.164       | -0.029          | -0.779          | -0.539                 |
| Ni(311)-1Ni-4Co-2,3Mo                                        | -10845.77       | -10845.15     | -1.164       | -0.045          | -1.233          | -0.993                 |
| Ni(311)-2Ni-4Co-1,3Mo                                        | -10845.76       | -10845.15     | -1.164       | -0.024          | -0.658          | -0.418                 |
| Ni(311)-3Ni-4Co-1,2Mo                                        | -10845.77       | -10845.15     | -1.164       | -0.039          | -1.063          | -0.823                 |
| Ni(311)-1,2Ni-4Co-3Mo                                        | -8376.696       | -8376.075     | -1.164       | -0.040          | -1.079          | -0.839                 |
| Ni(311)-1,3Ni-4Co-2Mo                                        | -8376.696       | -8376.075     | -1.164       | -0.040          | -1.077          | -0.837                 |
| Ni(311)-2,3Ni-4Co-1Mo<br>(optimal active site at position 2) | -8376.696       | -8376.085     | -1.164       | -0.029          | -0.790          | -0.550                 |
| Ni(311)-2,3Ni-4Co-1Mo<br>(optimal active site at position 3) | -8376.693       | -8376.085     | -1.164       | -0.026          | -0.715          | -0.475                 |

**Table S13.**  $\Delta G_{H\_ads}$  and  $E_{H_2O\_ads}$  of the Ni(311) crystal plane before and after doping.

| Type                    | Catalyst                                                     | $\Delta G_{H\_ads}/eV$ | $E_{H_2O\_ads}/eV$ |
|-------------------------|--------------------------------------------------------------|------------------------|--------------------|
| Original Catalyst       | Ni(311)                                                      | -0.540                 | -0.458             |
| Unitary-doped Catalyst  | Ni(311)-2,3Ni-1,4Co                                          | -0.567                 | -1.217             |
| Binary-doped Catalyst   | Ni(311)-2Ni-1,4Co-3Mo                                        | -0.997                 | -1.521             |
| Unitary -doped Catalyst | Ni(311)-2,3,4Ni-1Co                                          | -0.533                 | -0.341             |
| Binary-doped Catalyst   | Ni(311)-3Ni-1Co-2,4Mo                                        | -0.412                 | -0.427             |
| Unitary-doped Catalyst  | Ni(311)-1,2,3Ni-4Co                                          | -0.539                 | -0.421             |
| Binary-doped Catalyst   | Ni(311)-2,3Ni-4Co-1Mo<br>(optimal active site at position 2) | -0.475                 | -0.340             |
| Binary-doped Catalyst   | Ni(311)-2Ni-4Co-1,3Mo                                        | -0.418                 | -0.468             |

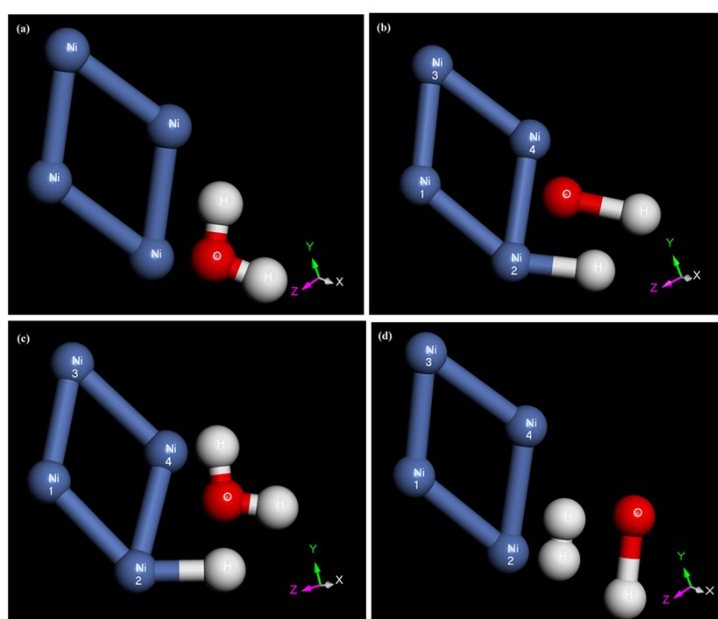

**Figure S5.** Geometric configurations of reactant, intermediate states, and product in the process of electrocatalytic hydrogen production on Ni(311) with optimal active site at position 2 : (a) Ni(311) + H<sub>2</sub>O; (b) Ni(311) - H + H<sub>2</sub>; (c) Ni(311) - H + H<sub>2</sub>O; (d) Ni(311) + H<sub>2</sub> + H<sub>2</sub>O

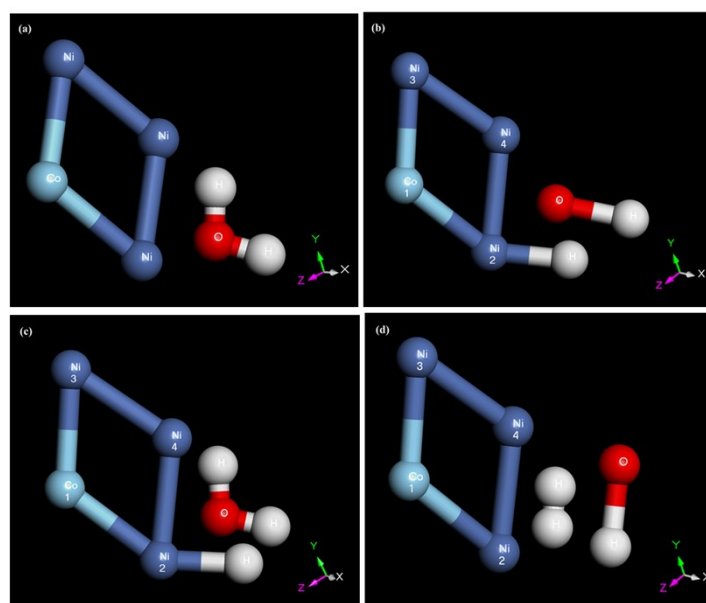

**Figure S6.** Geometric configurations of reactant, intermediate states, and product in the process of electrocatalytic hydrogen production on Ni(311)-2,3,4Ni-1Co with optimal active site at position 2: (a) Ni(311)-2,3,4Ni-1Co + H<sub>2</sub>O; (b) Ni(311)-2,3,4Ni-1Co - H + H<sub>2</sub>; (c) Ni(311)-2,3,4Ni-1Co - H + H<sub>2</sub>O; (d) Ni(311)-2,3,4Ni-1Co + H<sub>2</sub> + H<sub>2</sub>O
